# Supplementary material for: Integrative genetic analysis illuminates ALS heritability and identifies risk genes
Source: PubMed Central journal article supplement (PMC9860017; doi:10.1038/s41467-022-35724-1), 2023-01-20
Supplement: 41467_2022_35724_MOESM1_ESM.pdf [file 41467_2022_35724_MOESM1_ESM.pdf]

**Megat et al.**

**Integrative genetic analysis illuminates ALS heritability and identifies novel risk genes**

**SUPPLEMENTARY INFORMATION**

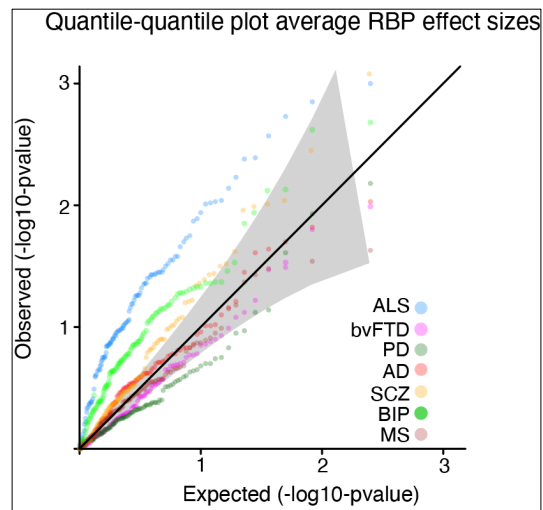

**Fig. S1:Quantile-quantile plot average RBP effects binding sizes**

Related to Figure 1C. Shaded gray area represent 95% confidence interval for the observed p-values.

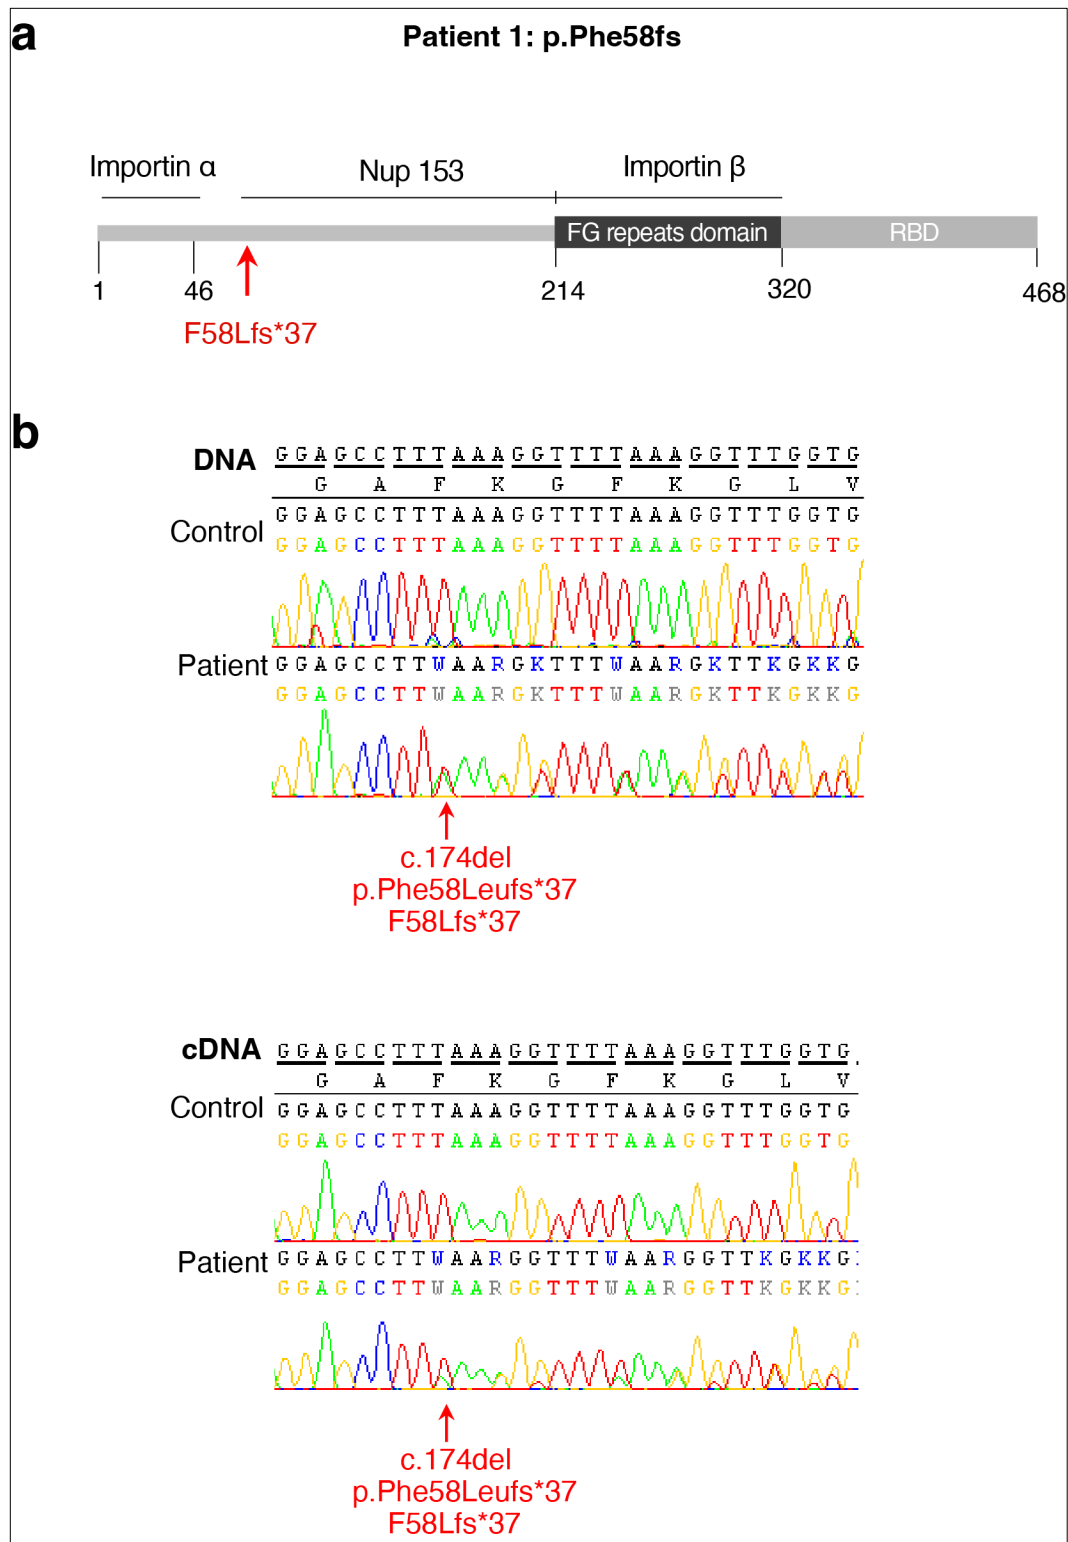

**Fig. S2: NUP50 Phe58Leufs\*37 mutation**

**a-** Representation of NUP50 protein domains with the position of the identified mutation in red. Regions of the protein interacting with importin  $\alpha$  (Imp.  $\alpha$ ), Nup153 and importin  $\beta$  (Imp.  $\beta$ ) are indicated.

**b-** Part of the chromatograms showing the position of the c.174del (p.F58Lfs\*37) in the patient and the corresponding normal sequence (healthy control) and cDNA amplified from mRNA extracted from lymphoblasts.

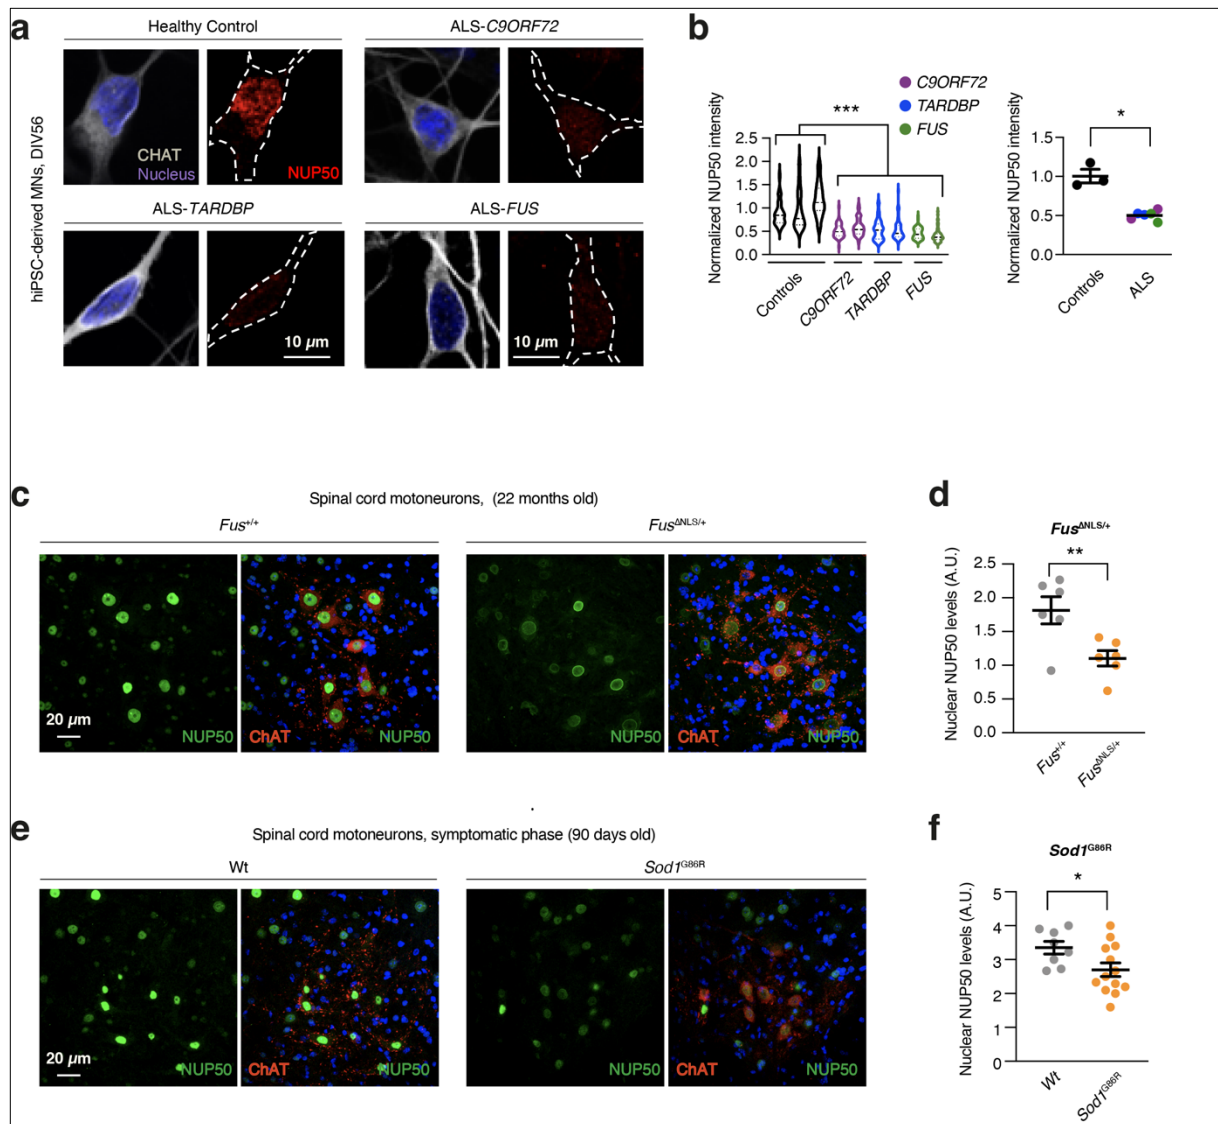

### Fig. S3: NUP50 nuclear loss is a common feature in cell and animal models of ALS

**a-b:** Representative image of iPSCs-derived motoneurons from fALS (FUS, TDP-43 and C9ORF72 HRE carriers) immunostained for CHAT (white), nucleus (DAPI, blue) and NUP50 (red). Control 1: n= 56 cells, Control 2: n=39 cells, Control 3: n=52 cells, *C9ORF72* 1: n= 54 cells, *C9ORF72* 2: n= 53 cells, *TARDBP* 1: n=54 cells, *TARDBP* 2: n=57 cells, *FUS* 1: n= 63 cells, *FUS* 2: 65 cells, examined over 3 independent experiments. The scatter plot on the left shows the mean per subject (either control or ALS). Panel b shows quantification of NUP50 levels : Left: Kruskal Wallis,  $***, p < 0.001$  for all comparisons between control and fALS cell lines. Right: Unpaired two tailed t-test :  $t=5,552, df=2,320, p=0.0220$ . Data are presented as mean values  $\pm$  SEM

**c-f:** Representative image of immunohistochemistry for NUP50 and CHAT in spinal cord sections showing a decrease in nuclear NUP50 levels in motor neurons of (c-d) *Fus*<sup>ANLS/+</sup> (Two-tailed Nested-t-test :  $t=3,293, df=10, p=**0,0081$ ) and (e-f) *Sod1*<sup>G86R</sup> (Two-tailed Nested-t-test :  $t=2,212, df=19, p=*0.038$ ) mice. A.U.: arbitrary units. Data are presented as mean values  $\pm$  SEM

For panel d, n=113 motor neurons examined in n=6 independent 22 months old male Wt animals, and n=132 motor neurons examined in n=6 independent *Fus*<sup>ANLS/+</sup> littermates. Each dot in the scatter plot indicates the mean of an individual animal.

For panel f, n=60 motor neurons examined in n=8 independent 90 days old Wt animals, and n=106 motor neurons examined in n=13 independent *Sod1*<sup>G86R</sup> littermate animals. Each dot in the scatter plot indicates the mean of an individual animal.

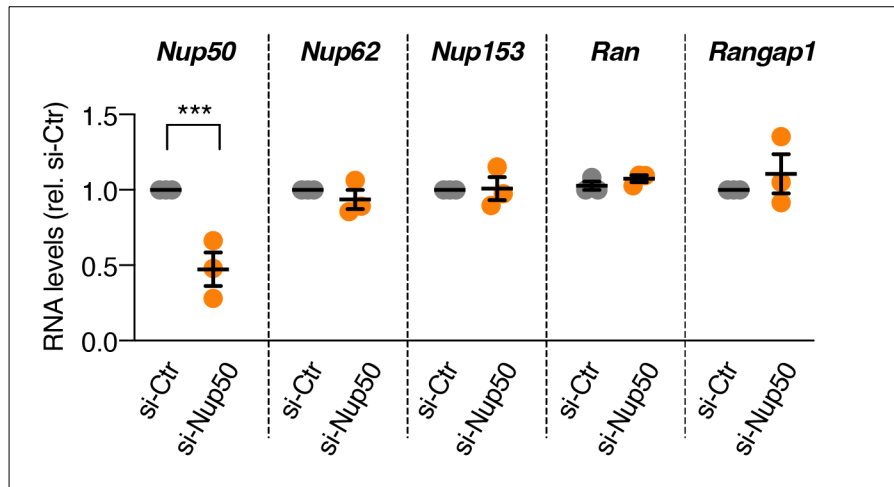

**Fig. S4: mRNA levels after *Nup50* knockdown**

Dot-plots showing mRNA levels of different nucleoporins after *Nup50* knock-down. Significant decrease of *Nup50* expression (Two-tailed Nested t-test  $t=8,124$ ,  $df=14$ , \*\*\*\* $p < 0.0001$ ) in HT22 cell lines.  $n=3$  independent experiments performed at least in duplicate. Data are presented as mean values  $\pm$  SEM

Each dot in the scatter plot indicates the mean of an individual experiment.

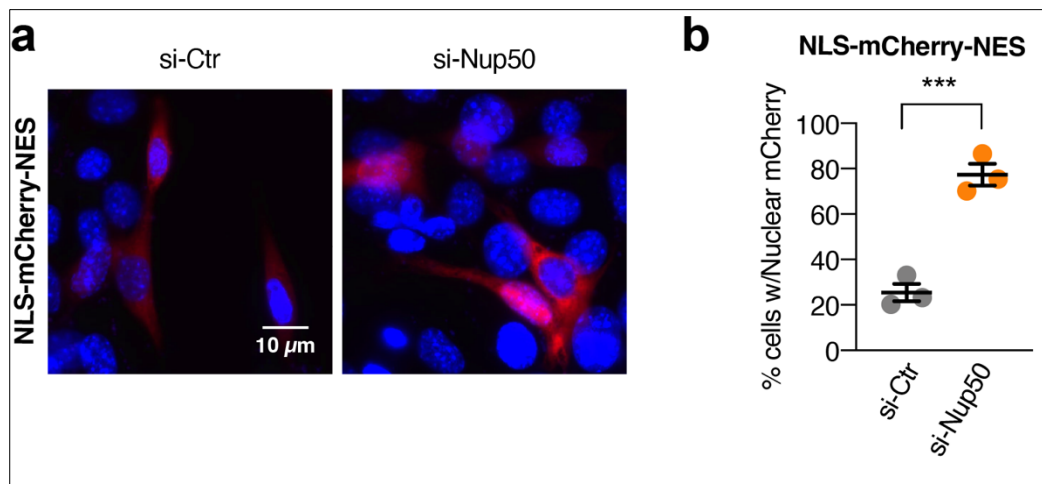

**Fig. S5: *Nup50* knockdown consequences on nuclear export activity in HT22 neuronal cells.**

**a-b:** Representative images of NLS-mCherry-NES reporter of nuclear export activity in HT22 cells transfected with si-Ctr or si-Nup50 (a), and (b) quantification (Two-tailed Nested t-test  $t=12,76$ ,  $df=38$ , \*\*\*\* $p < 0.0001$ ) in HT22 cell lines.  $n=3$  independent experiments performed at least in duplicate. Data are presented as mean values  $\pm$  SEM. Each dot in the scatter plot indicates the mean of an individual experiment.

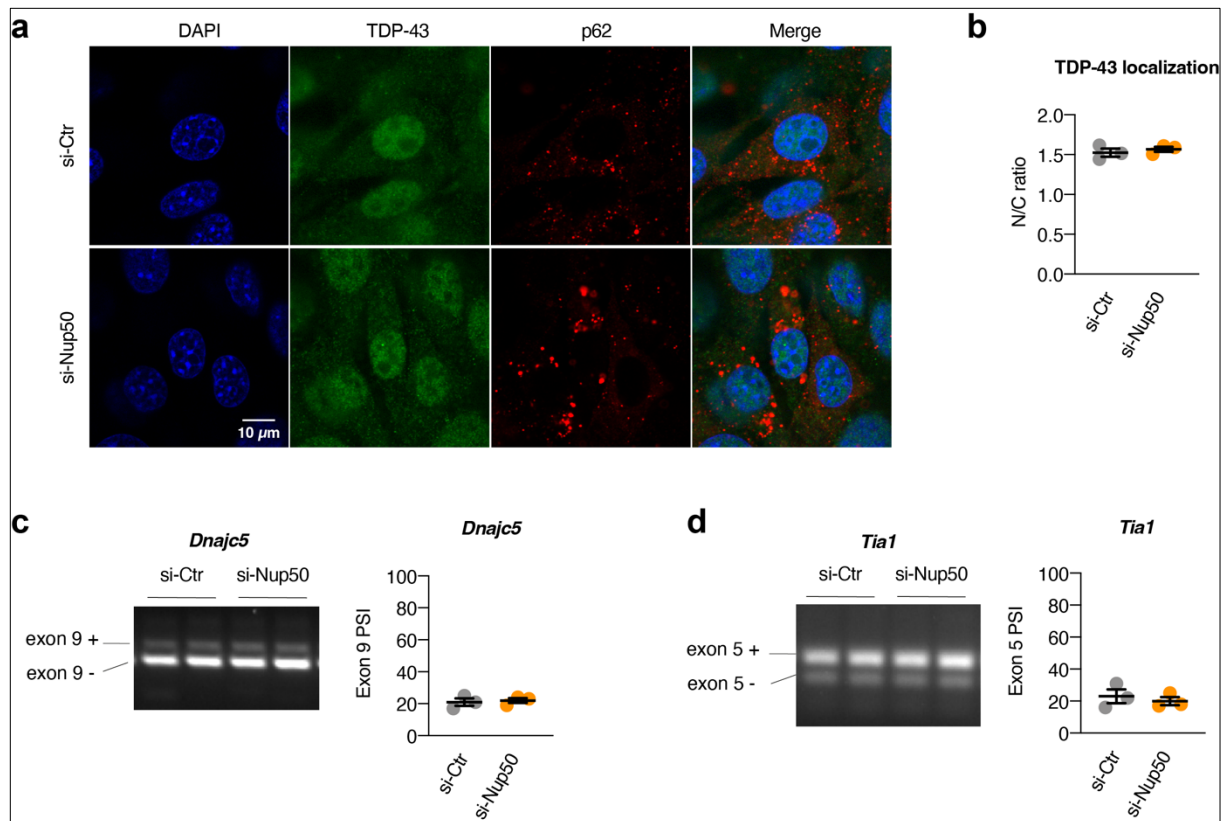

**Fig. S6: TDP-43 localization and function upon *Nup50* knock-down in HT22 cells**

**a-** representative immunofluorescence images of HT22 cells transfected either with a control siRNA (si-Ctr) or *Nup50* targeting siRNA (si-Nup50). Cells were stained 24 hours after transfection with DAPI (for nuclear staining, blue), TDP-43 (green) and p62 (red). While knockdown of *Nup50* led to p62 aggregates, we did not observe mislocalization of TDP-43. n=3 independent experiments performed at least in duplicate.

**b-** quantification of nuclear/cytoplasmic ratio as presented in panel a. There was no difference in TDP-43 nuclear enrichment according to *Nup50* knockdown. Data are presented as mean values +/- SEM. Data are presented as mean values +/- SEM. n=3 independent experiments performed at least in duplicate. Each dot in the scatter plot indicates the mean of an individual experiment.

**c-d-** splicing assays for *Dnajc5* exon 9 inclusion (C) and *Tia1* exon 5 inclusions (D), two splicing events known to be TDP-43 dependent in mouse neurons. There was no alteration in inclusion of either exon upon *Nup50* knock down. Data are presented as mean values +/- SEM. n=3 independent experiments performed at least in duplicate. Each dot in the scatter plot indicates the mean of an individual experiment.

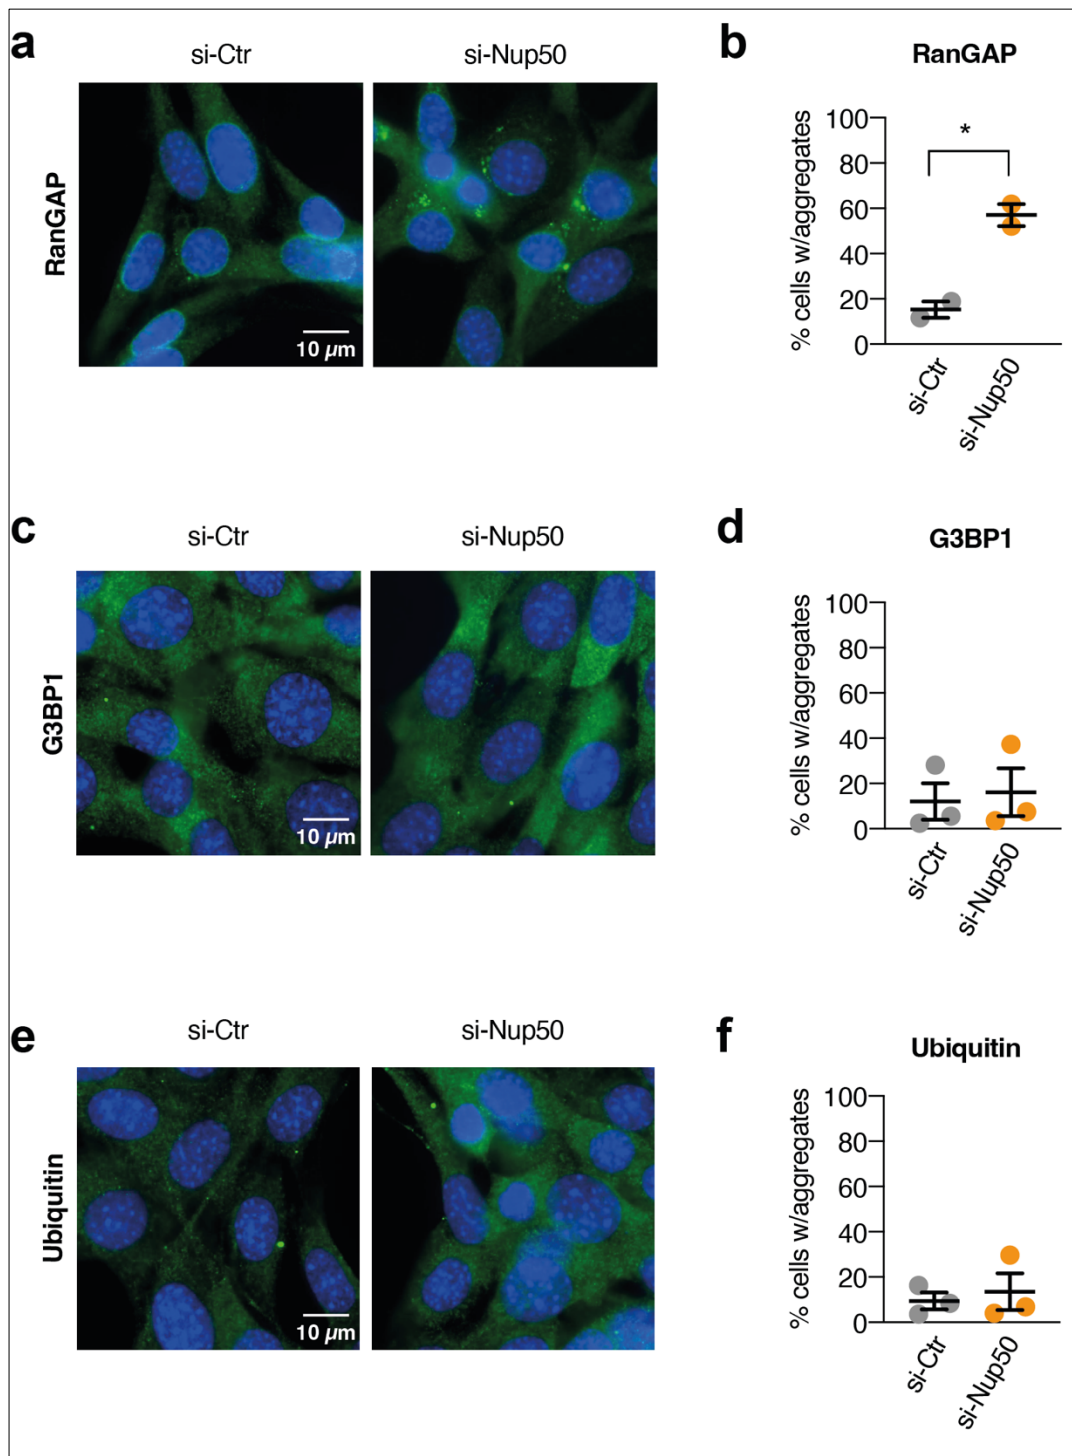

**Fig. S7: additional characterization of *Nup50* knockdown in HT22 neuronal cells.**

**a-f** - Representative images of RanGAP (a) G3BP1 (c), and Ubiquitin (e) immunofluorescence in HT22 cells transfected with si-Ctr or si-Nup50, and respective quantifications (b, d, f). Note the lack of increase in G3BP1 (Two-tailed Nested t-test,  $t=0.6486$ ,  $df=18$ ,  $p=0.52$ ) or Ubiquitin inclusions (Nested t-test,  $t=11.095$ ,  $df=17$ ,  $p=0.28$ ). Conversely, Nup50 knock-down increases the number of RanGAP1 inclusion (Two-tailed Nested t-test,  $t=10.78$ ,  $df=10$ ,  $*p<0.0001$ ). Data are presented as mean values  $\pm$  SEM. For panel a-b :  $n=2$  independent experiments performed in triplicate. For panels c-f:  $n=3$  independent experiments performed at least in triplicate. Each dot in the scatter plot indicates the mean of an individual experiment.

**Project Mine ALS sequencing consortium members**

| country  | name     |    |         |              | email                                                                                | affiliations                                                                                                                           |
|----------|----------|----|---------|--------------|--------------------------------------------------------------------------------------|----------------------------------------------------------------------------------------------------------------------------------------|
| Belgium  | Philip   |    | van     | Damme        | <a href="mailto:philip.vandamme@uzleuven.be">philip.vandamme@uzleuven.be</a>         | KU Leuven - University of Leuven, Department of Neurosciences                                                                          |
| France   | Philippe |    |         | Corcia       | <a href="mailto:corcia@med.univ-tours.fr">corcia@med.univ-tours.fr</a>               | Centre SLA, CHRU de Tours, Tours, France; UMR 1253, iBrain, Université de Tours, Inserm, Tours, France.                                |
| France   | Philippe |    |         | Couratier    | <a href="mailto:philippe.couratier@unilim.fr">philippe.couratier@unilim.fr</a>       | Centre SLA, CHRU de Tours, Tours, France.                                                                                              |
| France   | Patrick  |    |         | Vourc'h      | <a href="mailto:vourch@med.univ-tours.fr">vourch@med.univ-tours.fr</a>               | Service de Biochimie et Biologie moléculaire, CHU de Tours, Tours, France                                                              |
| Ireland  | Orla     |    |         | Hardiman     | <a href="mailto:oria@hardiman.net">oria@hardiman.net</a>                             | Academic Unit of Neurology, Trinity College Dublin, Trinity Biomedical Sciences Institute, Dublin, Republic of Ireland.                |
| Ireland  | Russell  |    |         | McLaughlin   | <a href="mailto:mclaugr@tcd.ie">mclaugr@tcd.ie</a>                                   | Complex Trait Genomics Laboratory, Smurfit Institute of Genetics, Trinity College Dublin, Dublin, Republic of Ireland.                 |
| Israel   | Marc     |    |         | Gotkine      | <a href="mailto:marc@gotkine.com">marc@gotkine.com</a>                               | Department of Neurology, Hadassah Medical Organization and Faculty of Medicine, Hebrew University of Jerusalem, Israel                 |
| Israel   | Vivian   |    |         | Drory        | <a href="mailto:ydrory@post.tau.ac.il">ydrory@post.tau.ac.il</a>                     | Department of Neurology Tel-Aviv Sourasky Medical Centre , Israel.                                                                     |
| Italy    | Nicola   |    |         | Ticozzi      | <a href="mailto:n.ticozzi@auxologico.it">n.ticozzi@auxologico.it</a>                 | Department of Neurology and Laboratory of Neuroscience, IRCCS Istituto Auxologico Italiano, Milano, Italy.                             |
| Italy    | Vincenzo |    |         | Silani       | <a href="mailto:vincenzo@silani.com">vincenzo@silani.com</a>                         | Department of Neurology and Laboratory of Neuroscience, IRCCS Istituto Auxologico Italiano, Milano, Italy.                             |
| NL       | Jan      | H. |         | Veldink      | <a href="mailto:J.H.Veldink@umcutrecht.nl">J.H.Veldink@umcutrecht.nl</a>             | Department of Neurology, UMC Utrecht Brain Center, University Medical Center Utrecht, Utrecht University, Utrecht, The Netherlands.    |
| NL       | Leonard  | H. | van den | Berg         | <a href="mailto:L.H.vandenBerg@umcutrecht.nl">L.H.vandenBerg@umcutrecht.nl</a>       | Department of Neurology, UMC Utrecht Brain Center, University Medical Center Utrecht, Utrecht University, Utrecht, The Netherlands.    |
| Portugal | Mamede   |    | de      | Carvalho     | <a href="mailto:mamedemq@gmail.com">mamedemq@gmail.com</a>                           | Instituto de Fisiologia, Instituto de Medicina Molecular, Faculdade de Medicina, Universidade de Lisboa, Lisbon, Portugal              |
| Spain    | Jesus    | S. |         | Mora Pardina | <a href="mailto:jesusmora@icloud.com">jesusmora@icloud.com</a>                       | ALS Unit, Hospital San Rafael, Madrid, Spain.                                                                                          |
| Spain    | Monica   |    |         | Povedano     | <a href="mailto:mpovedano@bellvitgehospital.cat">mpovedano@bellvitgehospital.cat</a> | la Unitat Funcional de Motoneurona, Cap de Secció de Neurofisiologia, Servei de Neurologia, Hospital Universitari de Bellvitge-IDIBELL |
| Sweden   | Peter    |    |         | Andersen     | <a href="mailto:peter.andersen@umu.se">peter.andersen@umu.se</a>                     | Department of Clinical Science, Neurosciences, Umeå University, Sweden.                                                                |
| Swiss    | Markus   |    |         | Weber        | <a href="mailto:markus.weber@kssp.ch">markus.weber@kssp.ch</a>                       | Neuromuscular Diseases Unit/ALS Clinic, Kantonsspital St. Gallen, 9007, St. Gallen, Switzerland.                                       |
| Turkey   | Nazli    | A. |         | Başak        | <a href="mailto:nbasak@ku.edu.tr">nbasak@ku.edu.tr</a>                               | Koç University, School of Medicine, KUTTAM-NDAL, Istanbul Turkey.                                                                      |
| UK       | Ammar    |    |         | Al-Chalabi   | <a href="mailto:ammar.al-chalabi@kcl.ac.uk">ammar.al-chalabi@kcl.ac.uk</a>           | Maurice Wohl Clinical Neuroscience Institute, King's College London, Department of Basic and Clinical Neuroscience, London, UK.        |
| UK       | Chris    |    |         | Shaw         | <a href="mailto:chris.shaw@kcl.ac.uk">chris.shaw@kcl.ac.uk</a>                       | Maurice Wohl Clinical Neuroscience Institute, King's College London, Department of Basic and Clinical Neuroscience, London, UK.        |
| UK       | Pamela   | J. |         | Shaw         | <a href="mailto:pamela.shaw@sheffield.ac.uk">pamela.shaw@sheffield.ac.uk</a>         | Sheffield Institute for Translational Neuroscience (SITraN), University of Sheffield, Sheffield, UK.                                   |
| UK       | Karen    | E. |         | Morrison     | <a href="mailto:k.morrison@qub.ac.uk">k.morrison@qub.ac.uk</a>                       | School of Medicine, Dentistry and Biomedical Sciences, Queen's University Belfast, UK.                                                 |
| USA      | John     | E. |         | Landers      | <a href="mailto:John.Landers@umassmed.edu">John.Landers@umassmed.edu</a>             | Department of Neurology, University of Massachusetts Medical School, Worcester, MA, USA.                                               |
| USA      | Jonathan | D. |         | Glass        | <a href="mailto:jglas03@emory.edu">jglas03@emory.edu</a>                             | Department Neurology, Emory University School of Medicine, Atlanta, GA, USA.                                                           |
| USA      | Clifton  | L. |         | Dalgard      | <a href="mailto:clifton.dalgard@usuhs.edu">clifton.dalgard@usuhs.edu</a>             | Department of Anatomy, Physiology & Genetics, Director, The American Genome Center                                                     |
