# Supplementary material for: Integrative genetic analysis illuminates ALS heritability and identifies risk genes
Source: PubMed Central journal article supplement (PMC9860017; doi:10.1038/s41467-022-35724-1), 2023-01-20
Supplement: 41467_2022_35724_MOESM3_ESM.pdf [file 41467_2022_35724_MOESM3_ESM.pdf]

## **Description of Additional Supplementary Files**

File Name: Supplementary Data 1

Description: Datasets used. Source of all datasets used, with hyperlinks and references.

File Name: Supplementary Data 2

Description: Oligonucleotides. Sequences of all oligonucleotides used for RT-qPCR studies in human, mouse and fly cells or tissues.

File Name: Supplementary Data 3

Description: iPSC lines used. Source and references of human iPSC lines used in Figure S3a and S3b.
